# Supplementary material for: A Stackable Triboelectric Nanogenerator for Wave-Driven Marine Buoys
Source: MDPI journal article supplement (doi:10.3390/nano12040594), 2022-02-10
Supplement: s1 [file s1]

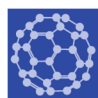

## Supplementary Materials

# A Stackable Triboelectric Nanogenerator for Wave-Driven Marine Buoys

Hao Wang <sup>1,†</sup>, Chuanqing Zhu <sup>1,†</sup>, Weichen Wang <sup>1,†</sup>, Ruijiang Xu <sup>1</sup>, Pengfei Chen <sup>2</sup>, Taili Du <sup>1</sup>, Tingxi Xue <sup>1</sup>, Zhaoyang Wang <sup>1</sup> and Minyi Xu <sup>1,\*</sup>

<sup>1</sup> Dalian Key Lab of Marine Micro/Nano Energy and Self-powered Systems, Marine Engineering College, Dalian Maritime University, Dalian, 116026, China; hao8901@dlmu.edu.cn (H.W.); zcq@dlmu.edu.cn (C.Z.); wangweichen@dlmu.edu.cn (W.W.); xuruijiang@dlmu.edu.cn (R.X.); dutaili@dlmu.edu.cn (T.D.); tingxixue@gmail.com (T.X.); 15841832625@163.com (Z.W.)

<sup>2</sup> Beijing Institute of Nanoenergy and Nanosystems, Chinese Academy of Sciences, Beijing 100085, China; chenpengfei@binn.cas.cn (P.C.)

\* Correspondence: xuminyi@dlmu.edu.cn; Tel.: +86-18941134769

† These authors contributed equally to this work.

**Citation:** Wang, H.; Zhu, C.; Wang, W.; Xu, R.; Chen, P.; Du, T.; Xue, T.; Wang, Z.; Xu, M. A Stackable Triboelectric Nanogenerator for Wave-Driven Marine Buoys. *Nanomaterials* **2022**, *12*, 594. <https://doi.org/10.3390/nano12040594>

Academic Editor: Fabrizio Pirri

Received: 7 January 2022

Accepted: 7 February 2022

Published: 10 February 2022

**Publisher's Note:** MDPI stays neutral with regard to jurisdictional claims in published maps and institutional affiliations.

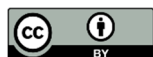

**Copyright:** © 2022 by the authors. Licensee MDPI, Basel, Switzerland. This article is an open access article distributed under the terms and conditions of the Creative Commons Attribution (CC BY) license (<https://creativecommons.org/licenses/by/4.0/>).

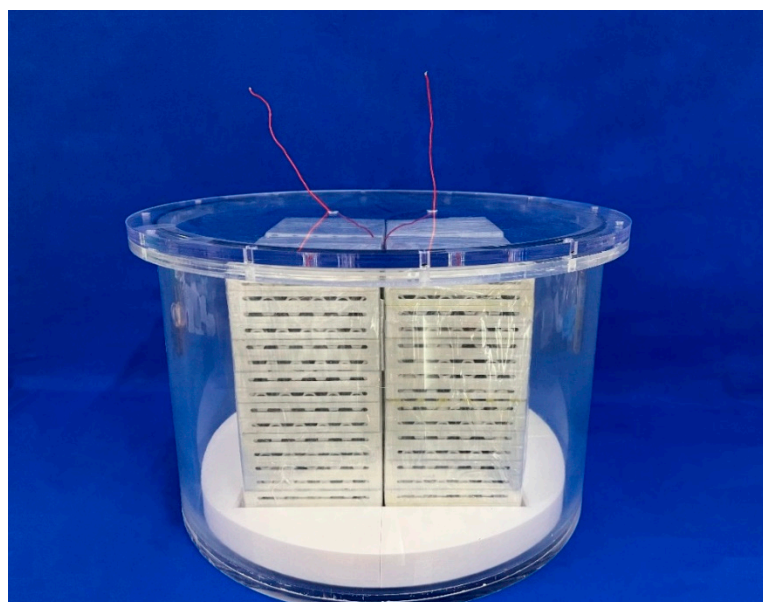

**Figure S1.** Photograph of the S-TENG.

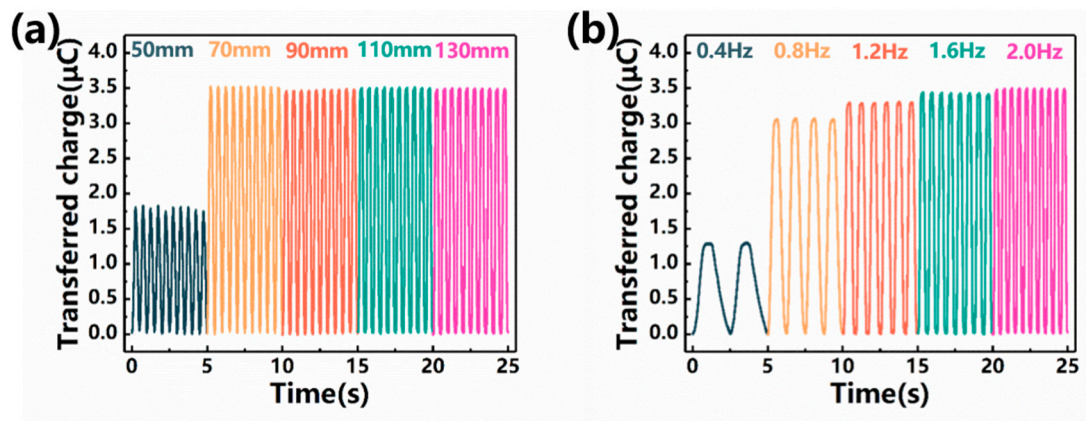

**Figure S2.** The transferred charge time series (a) variation with the vibration amplitude (b) variation with the vibration frequency (corresponding to Figure 3 (a,b)).

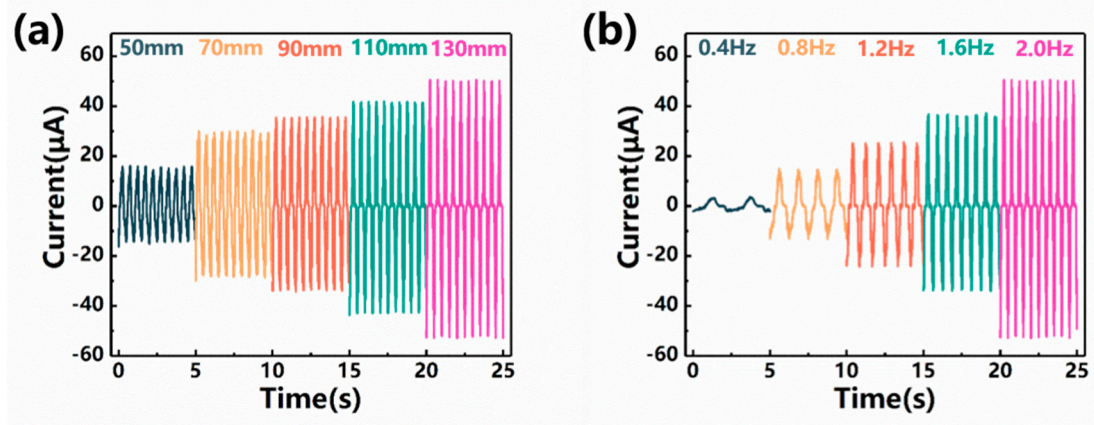

**Figure S3.** The short circuit current time series (a) variation with the vibration amplitude (b) variation with the vibration frequency (corresponding to Figure 3 (d, e)).

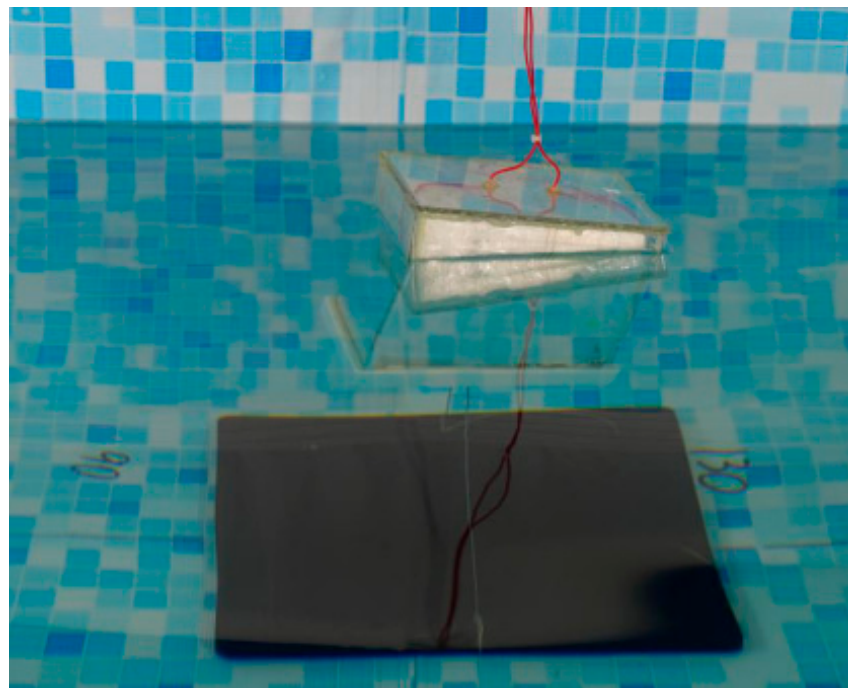

**Figure S4.** Photograph of the S-TENG in the test basin.

The following demo videos are also uploaded:

**Supplementary Video S1:** 350 LEDs lighted up by the S-TENG.

**Supplementary Video S2:** The S-TENG driving temperature sensor in water

**Supplementary Video S3:** The S-TENG driving PH sensor in water

**Supplementary Video S4:** The S-TENG driving salinity sensor in water
