# Supplementary material for: A Stackable Triboelectric Nanogenerator for Wave-Driven Marine Buoys
Source: Nanomaterials (Basel). 2022 Feb 10;12(4):594. doi: 10.3390/nano12040594 (PMC8877952; doi:10.3390/nano12040594)
Supplement: Supplementary file 1 [file nanomaterials-12-00594-s001.zip]

Archive with 5 entries (5 files):
- nanomaterials-1568456-supplementary figures.pdf
- Video S1.mp4
- Video S2.mp4
- Video S3.mp4
- Video S4.mp4
